# Supplementary material for: Cd1−xMgxS CQD thin films for high performance and highly selective NIR photodetection
Source: Royal Society of Chemistry journal article supplement (doi:10.1039/d1dt01547h), 2021-01-01
Supplement: d1dt01547h8.pdf [file d1dt01547h8.pdf]

## Cd<sub>1-x</sub>Mg<sub>x</sub>S CQDs Thin Films for High Performance and Highly Selective NIR Photodetection

Tania Kalsi<sup>1</sup>, and Pragati Kumar<sup>1\*</sup>

<sup>1</sup>Department of Nanoscience and Materials, Central University of Jammu, Jammu-181143, India

Email: [pkumar.phy@gmail.com](mailto:pkumar.phy@gmail.com)\*

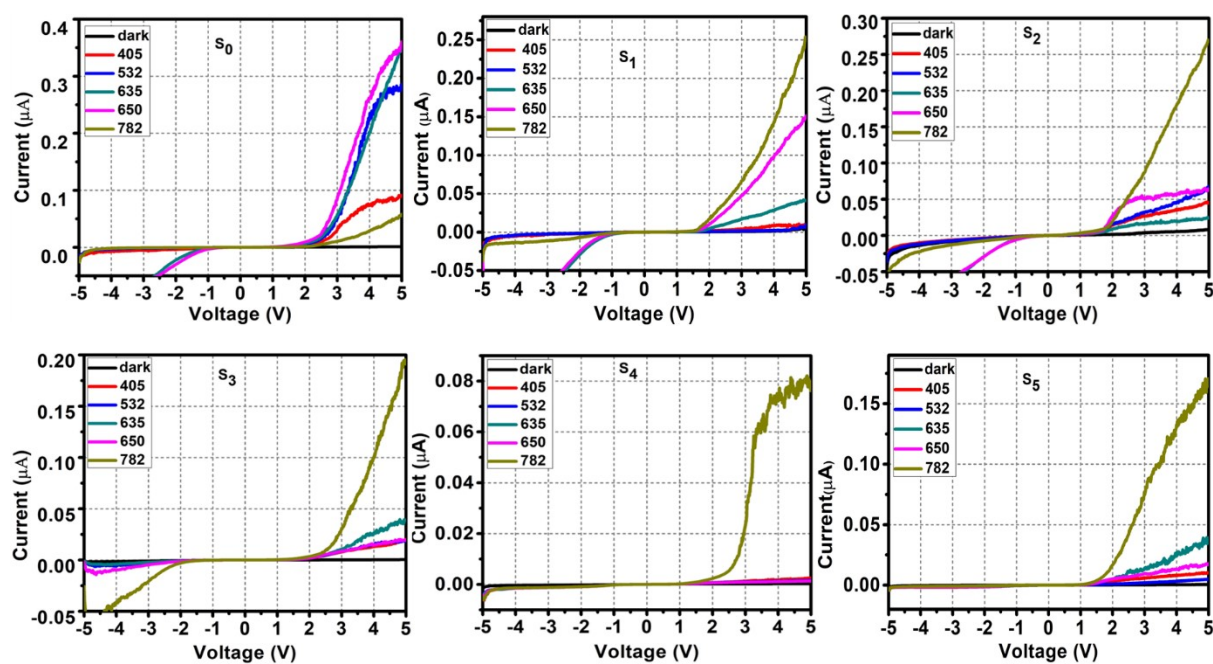

Fig. S1 : Linear plot of  $I$ - $V$  characteristics of PDs S<sub>0</sub>,..., S<sub>5</sub> under the illumination of light of different wavelength.

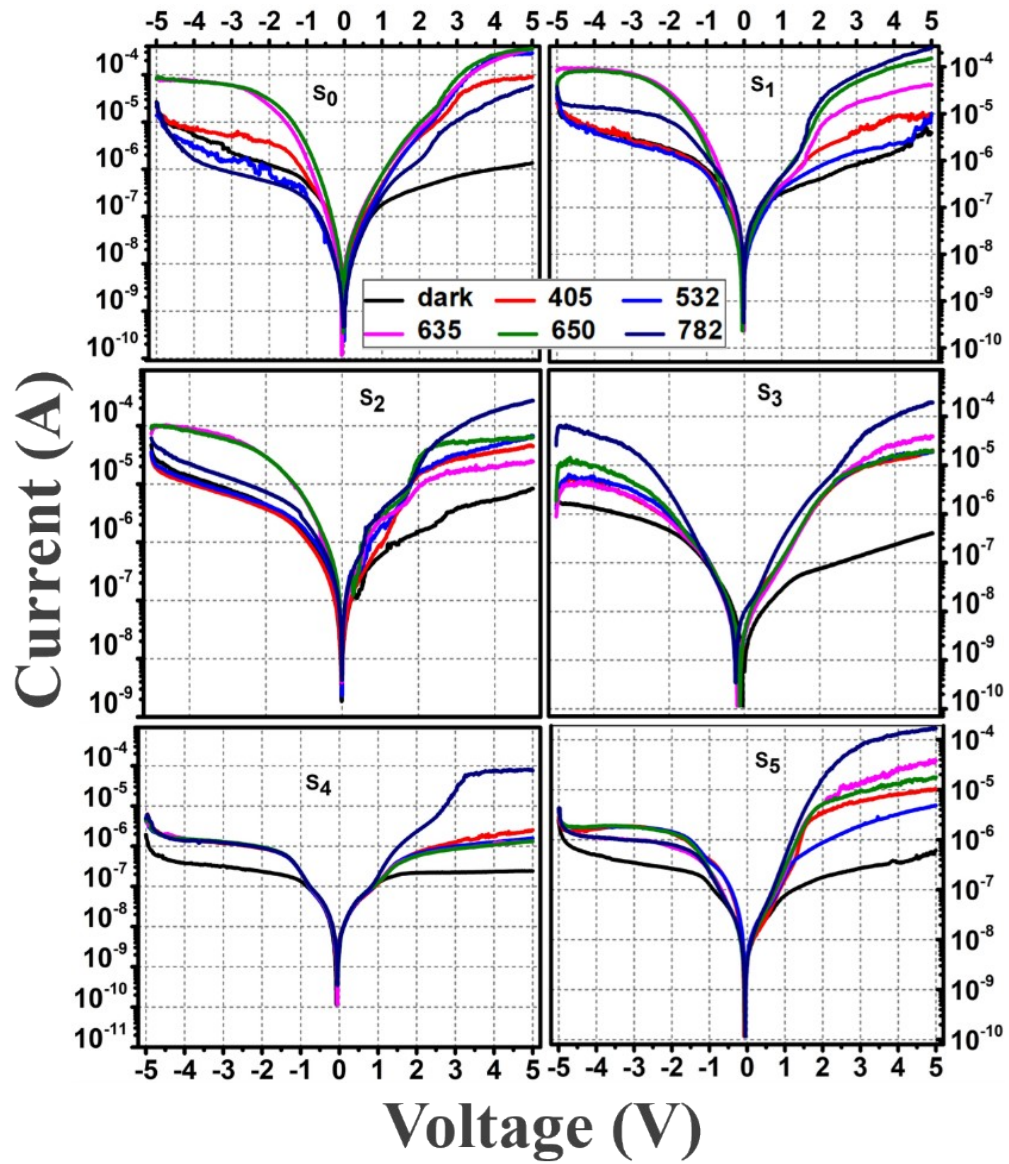

Fig. S2 : Semi-log plot of I-V characteristics of PDs  $S_0, \dots, S_5$  under the illumination of light of different wavelength.

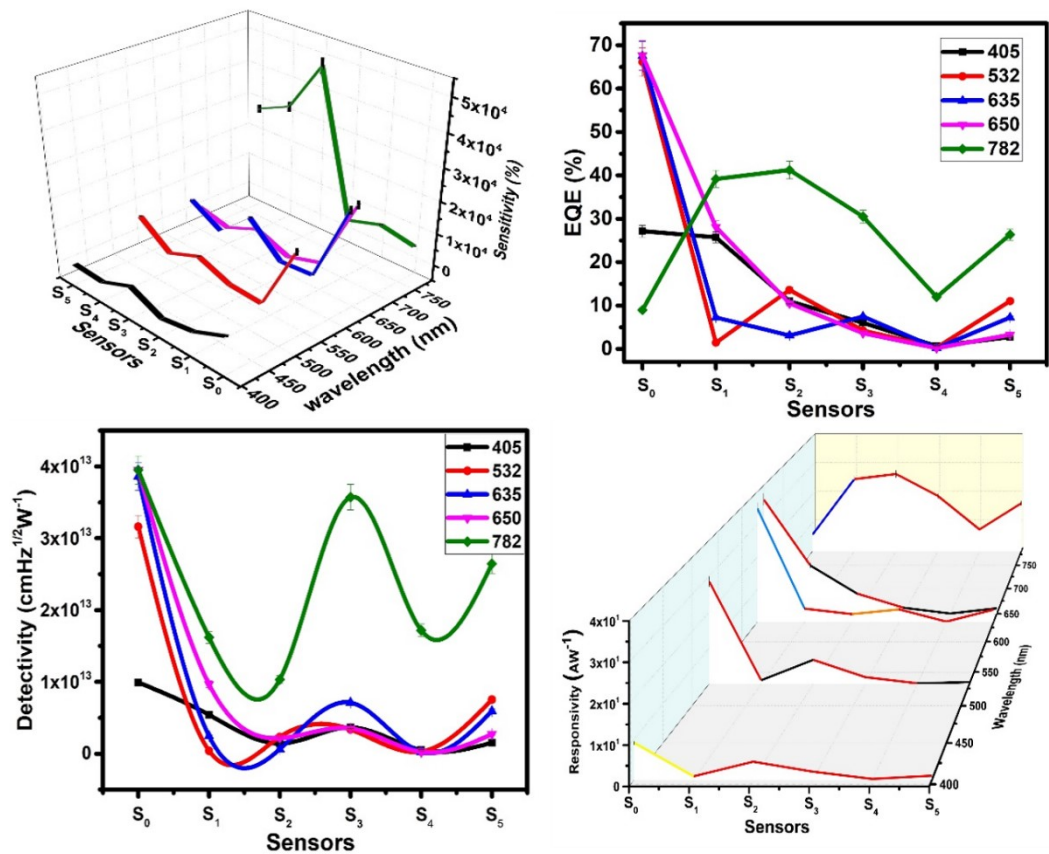

Fig. S3: (a) Sensitivity ( $S$ ), (b) EQE, (c) Detectivity ( $D$ ) and (d) Responsivity ( $R$ ) of PDs  $S_0, \dots, S_5$  under the illumination of light at 405 nm, 532 nm, 635 nm, 650 nm and 782 nm.

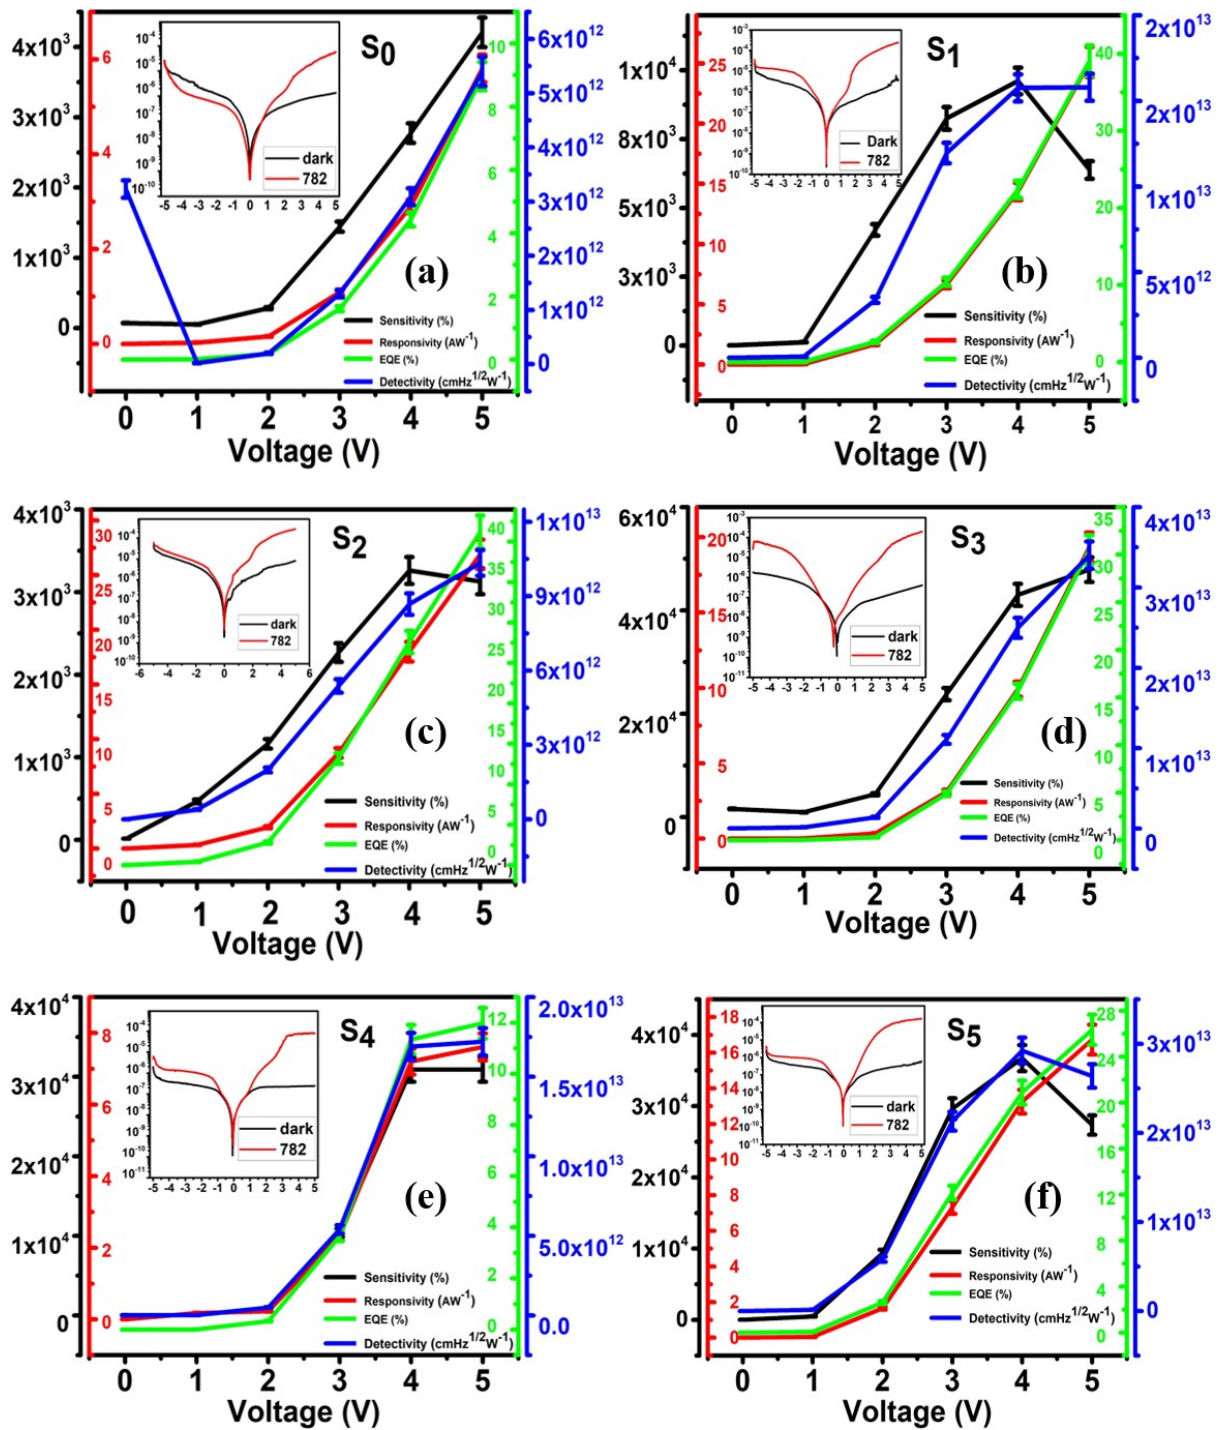

Fig. S4: Sensitivity ( $S$ ), EQE, Detectivity ( $D$ ) and Responsivity ( $R$ ) of PDs (a) S<sub>0</sub>, (b) S<sub>1</sub>, (c) S<sub>2</sub>, (d) S<sub>3</sub>, (e) S<sub>4</sub> and (f) S<sub>5</sub> as a function of +ve biasing voltage under the illumination of light of wavelength of 782nm.

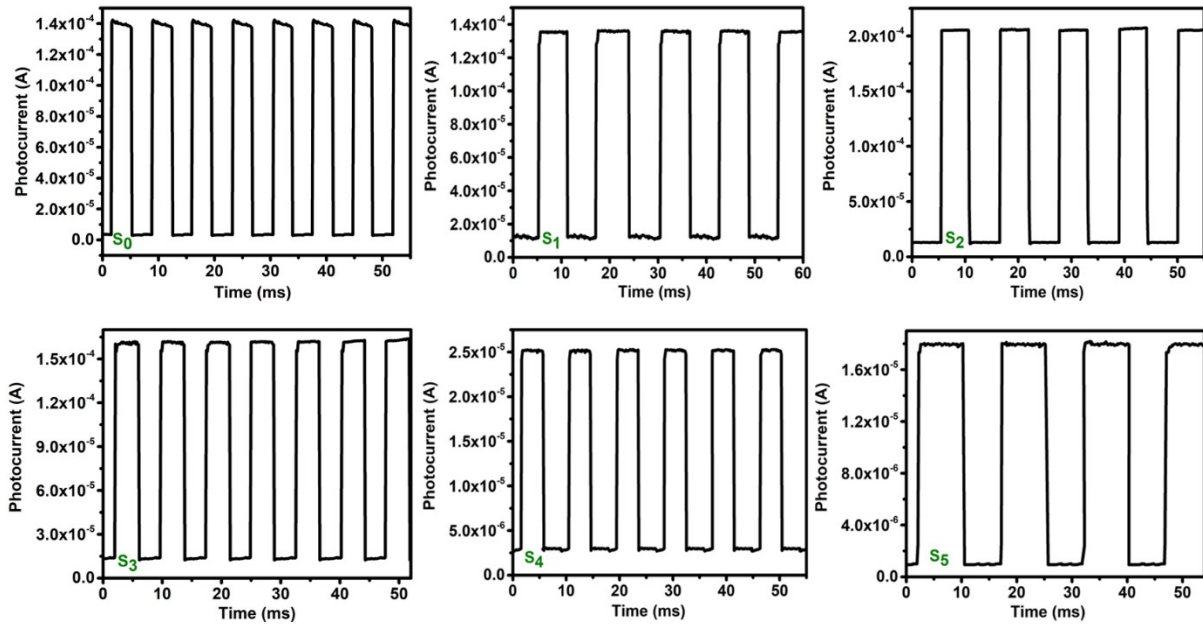

Fig. S5:  $I-t$  characteristics of PDs  $S_0, \dots, S_5$  at an external bias of 3V under the illumination of light of 782nm.

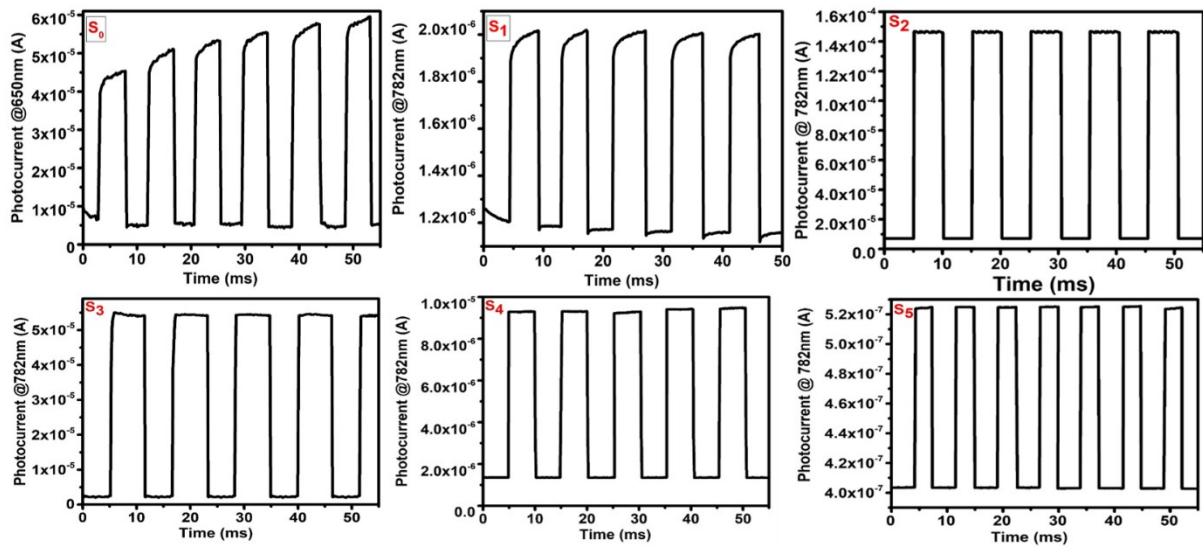

Fig. S6:  $I-t$  characteristics of PDs  $S_0, \dots, S_5$  at an external bias of 5V under the illumination of light of 782nm.

Table T1: Estimated response times from  $I-t$  curves for PDs  $S_0, \dots, S_5$  at different external bias voltages from 1V to 5V under the illumination of light of 782nm.

| Sensor | Response Time (ms) |       |       |       |       |       |       |       |       |       |
|--------|--------------------|-------|-------|-------|-------|-------|-------|-------|-------|-------|
|        | 1V                 |       | 2V    |       | 3V    |       | 4V    |       | 5V    |       |
|        | $t_r$              | $t_f$ | $t_r$ | $t_f$ | $t_r$ | $t_f$ | $t_r$ | $t_f$ | $t_r$ | $t_f$ |
| $S_0$  | 130                | 130   | 1033  | 226   | 331   | 208   | 303   | 313   | 215   | 220   |
| $S_1$  | 371                | 124   | 924   | 220   | 313   | 207   | 385   | 131   | 124   | 129   |
| $S_2$  | 229                | 228   | 322   | 217   | 296   | 177   | 224   | 184   | 138   | 173   |
| $S_3$  | 221                | 135   | 140   | 124   | 110   | 116   | 157   | 131   | 123   | 120   |
| $S_4$  | 186                | 165   | 272   | 218   | 305   | 210   | 177   | 142   | 123   | 139   |
| $S_5$  | 196                | 207   | 279   | 250   | 145   | 130   | 184   | 172   | 153   | 238   |
