# Supplementary figures and images for: Cd1−xMgxS CQD thin films for high performance and highly selective NIR photodetection
Source: Royal Society of Chemistry journal article supplement (doi:10.1039/d1dt01547h), 2021-01-01

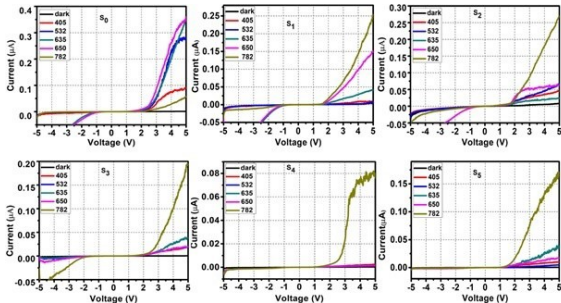

Supplement: d1dt01547h2.pdf [file d1dt01547h2.pdf]

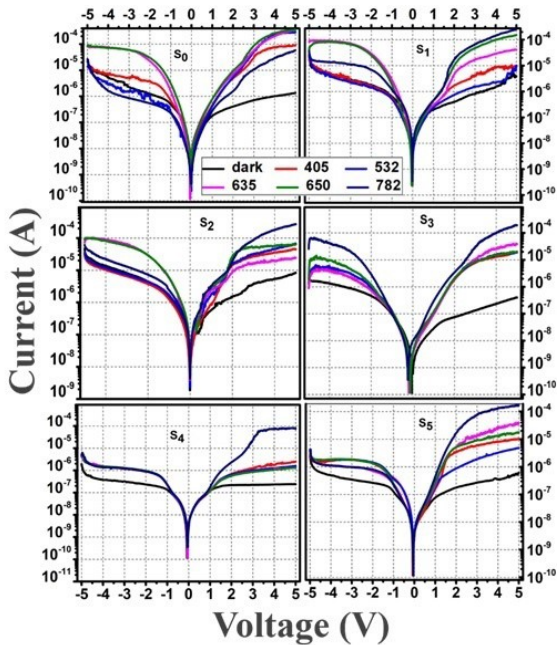

Supplement: d1dt01547h3.pdf [file d1dt01547h3.pdf]

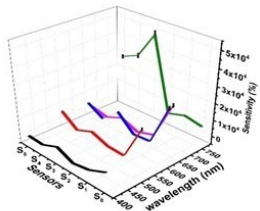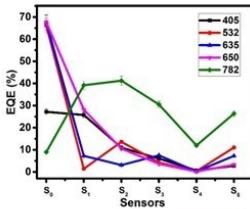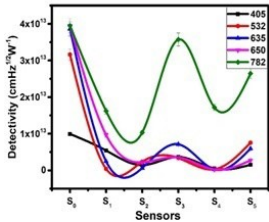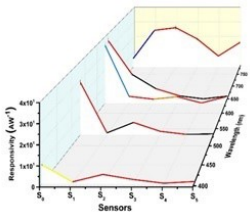

Supplement: d1dt01547h4.pdf [file d1dt01547h4.pdf]

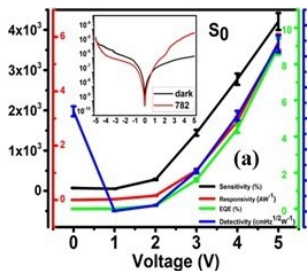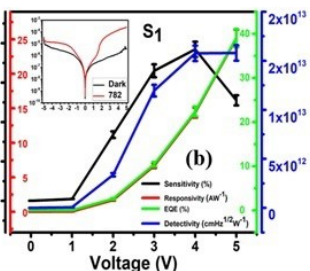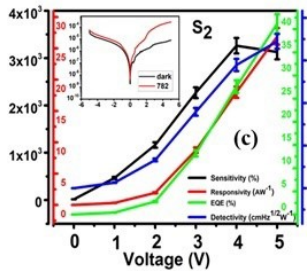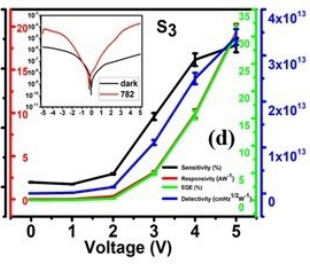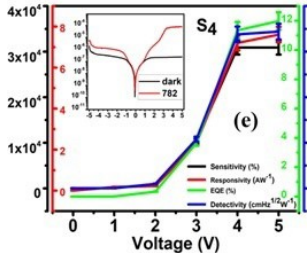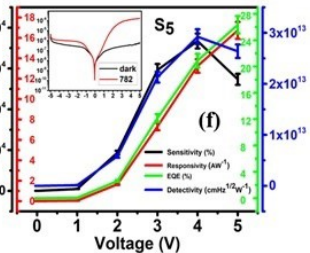

Supplement: d1dt01547h5.pdf [file d1dt01547h5.pdf]

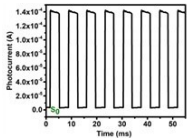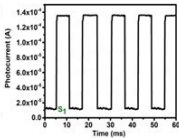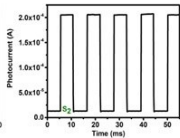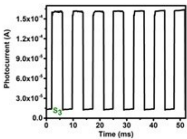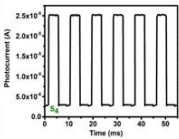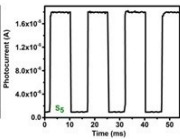

Supplement: d1dt01547h6.pdf [file d1dt01547h6.pdf]

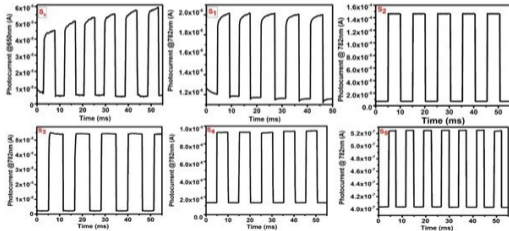

Supplement: d1dt01547h7.pdf [file d1dt01547h7.pdf]
